# Supplementary material for: Multistate Memristive Tantalum Oxide Devices for Ternary Arithmetic
Source: PubMed Central journal article supplement (PMC5105152; doi:10.1038/srep36652), 2016-11-11
Supplement: srep36652-s1.pdf [file srep36652-s1.pdf]

# SUPPLEMENTARY INFORMATION

## Multistate Memristive Tantalum Oxide Devices for Ternary Arithmetic

Wonjoo Kim<sup>1</sup>, Anupam Chattopadhyay<sup>3</sup>, Anne Siemon<sup>2</sup>, Eike. Linn<sup>2</sup>, Rainer Waser<sup>1,2</sup>, Vikas Rana<sup>1</sup>

<sup>1</sup> Peter Grünberg Institut 7, Forschungszentrum Jülich GmbH, 52425 Jülich, Germany

<sup>2</sup> Institut für Werkstoffe der Elektrotechnik II, RWTH Aachen University, 52074 Aachen, Germany

<sup>3</sup> School of Computer Engineering, Nanyang Technological University, Singapore

Corresponding author: Dr. Vikas Rana (v.rana@fz-juelich.de)

## Supplementary

### S1 Comparison Nano devices – Micro devices

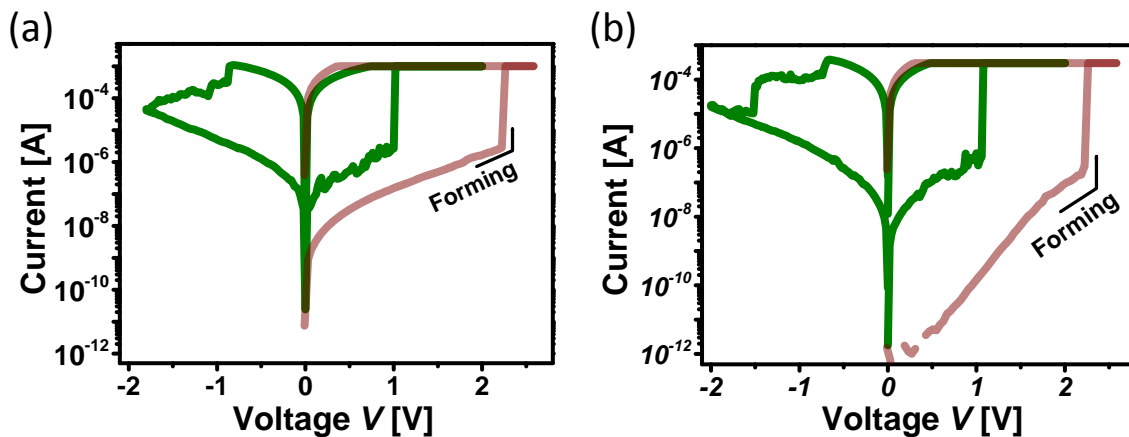

**Figure S1** Typical *I-V* characteristics of (a)  $5 \mu\text{m} \times 5 \mu\text{m}$  micro device and (b)  $80 \text{ nm} \times 80 \text{ nm}$  nano device. Both devices have the layer stacks of 25 nm Pt / 13 nm W / 7 nm TaO<sub>x</sub> / 30 nm Pt. Both devices require a forming process as an initialization before RESET and SET processes. Their *I-V*-characteristic are very similar to each other.

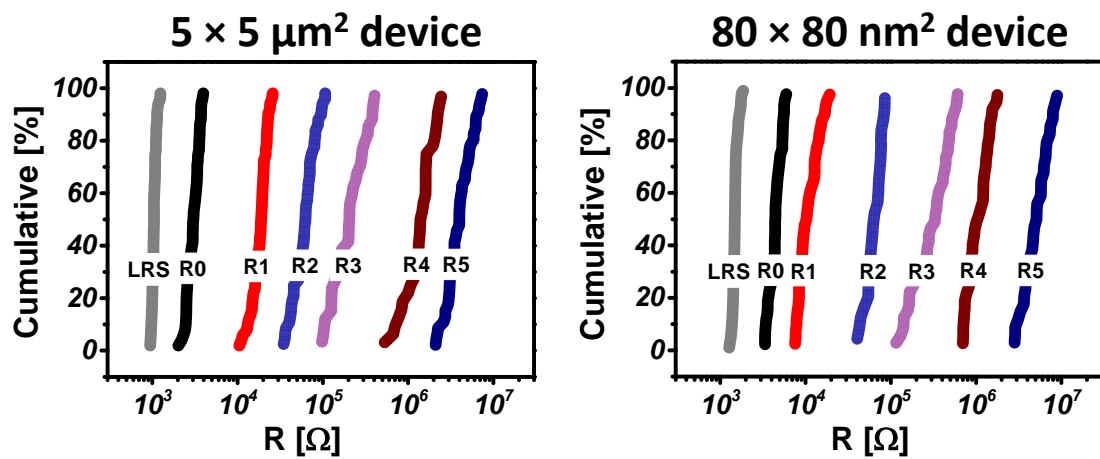

**Figure S2** Comparison of resistance distribution for micro- and nano-meter ReRAM devices. The nanometer device also offers the tight distribution of the resistive states.

### S2 Pulsed SET operation

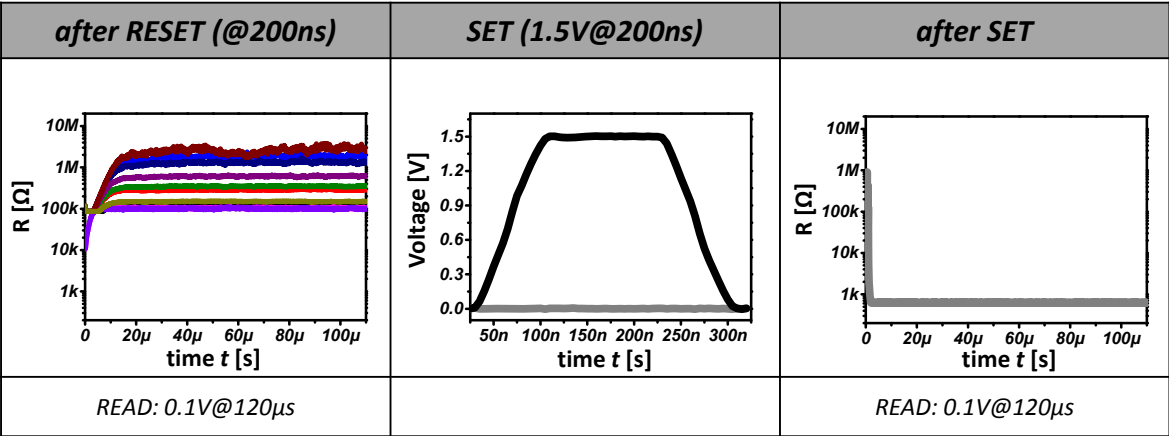

**Figure S3 Feasibility of pulsed SET operation.** After the RESET operation, the ReRAM device is in a multi-level state (left). A SET pulse of 1.5 V (middle) sets the device to the LRS (right).

## S3 Full data of the proof-of-concept measurements

### $z_0$ device in $1 \times 3$ array

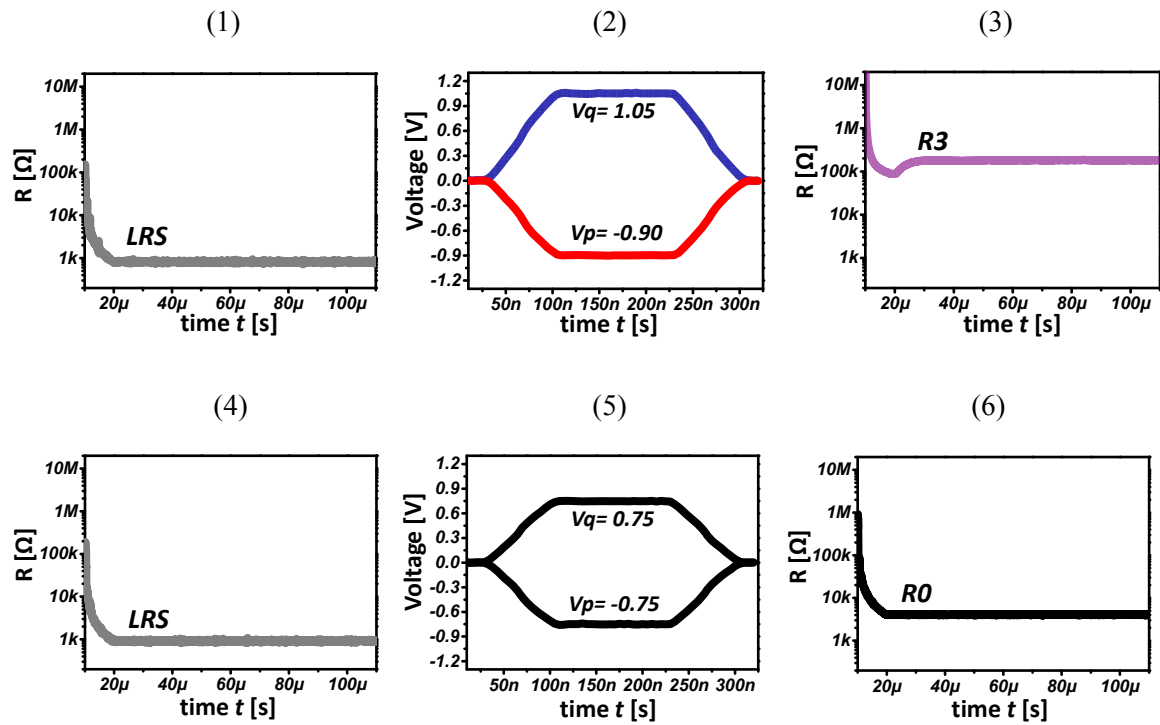

**Figure S4.** Sum calculation in  $z_0$  step-by-step. (1) Initialization: SET to LRS. (2) Sum calculation. (3) State is R3  $\rightarrow$  Mapping to R0 required. (4) LRS after SET. (5) Write to R0. (6) Final state R0. Color code for voltages: see Fig. 3a. Color code for resistances: see Fig. 3b.

## $z_1$ Device in 1 x 3 array

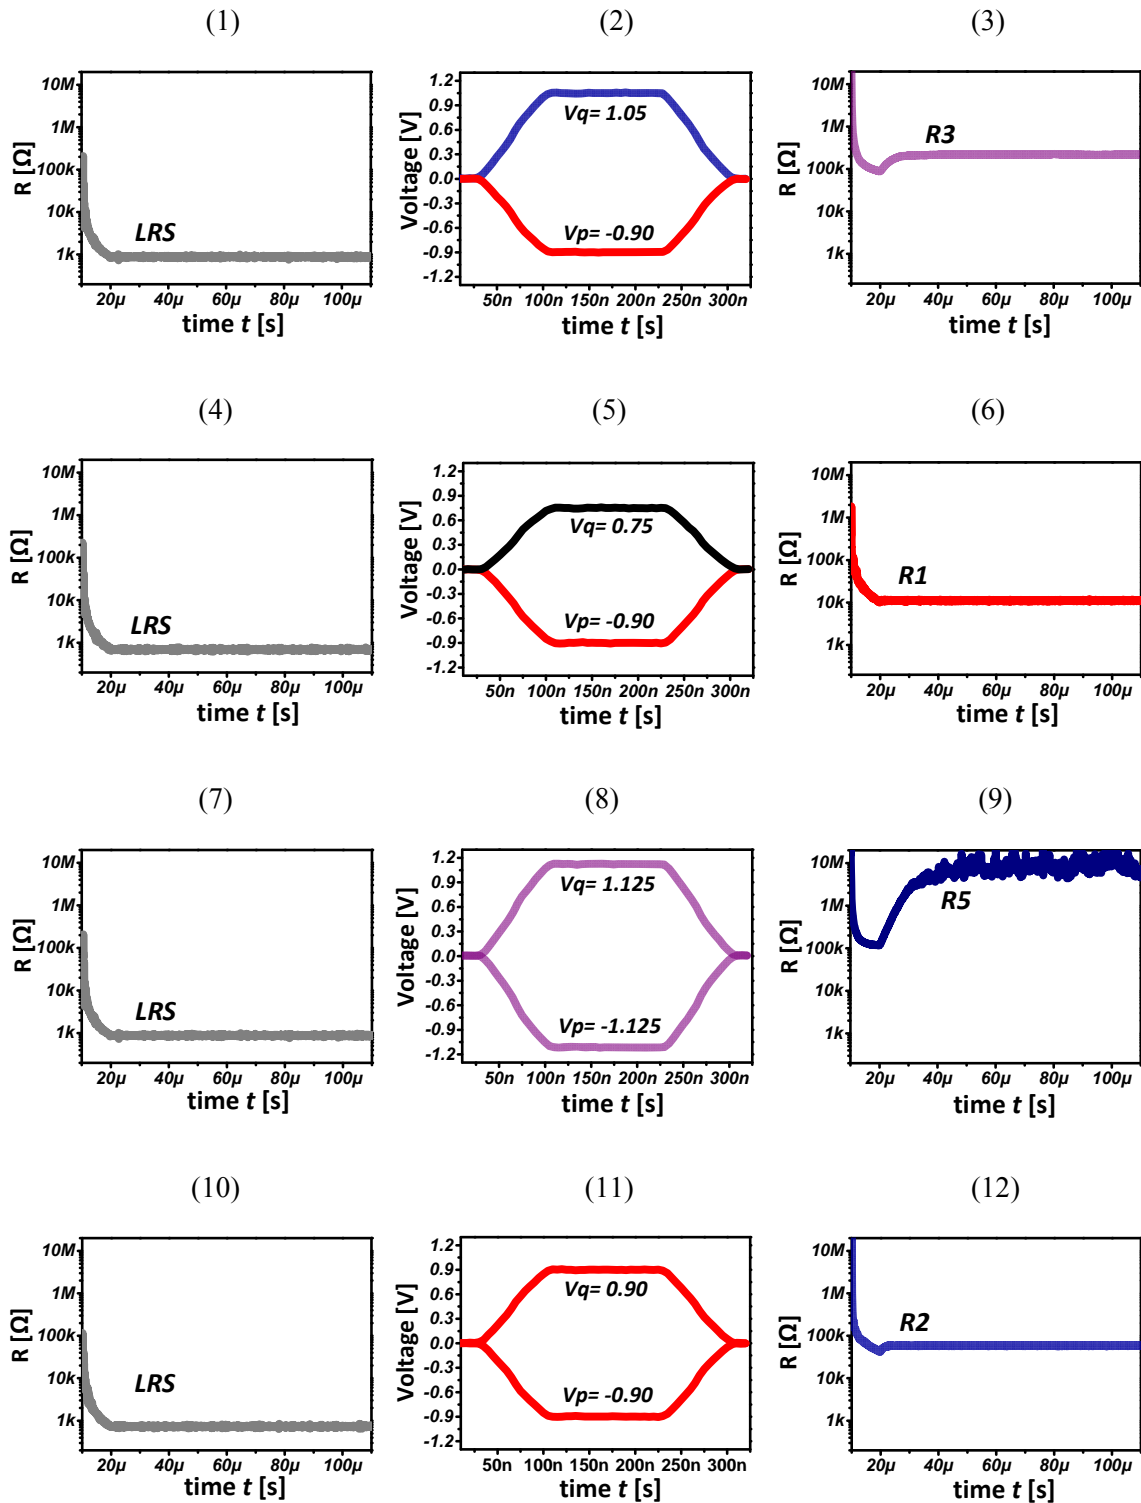

**Figure S5. Sum calculation in  $z_1$  step-by-step.** (1) Initialization: SET to LRS. (2) Carry calculation. (3) State is R3  $\rightarrow$  Mapping to R1 required. (4) LRS after SET. (5) Write to R1. (6) State is R1. (7) LRS after SET. (8) Sum calculation. (9) State is R5  $\rightarrow$  Mapping to R2 required. (10) LRS after SET. (11) Write R2. (12) Final state R2.

Color code for voltages: see Fig. 3a. Color code for resistances: see Fig. 3b.

## $z_2$ Device in 1 x 3 array

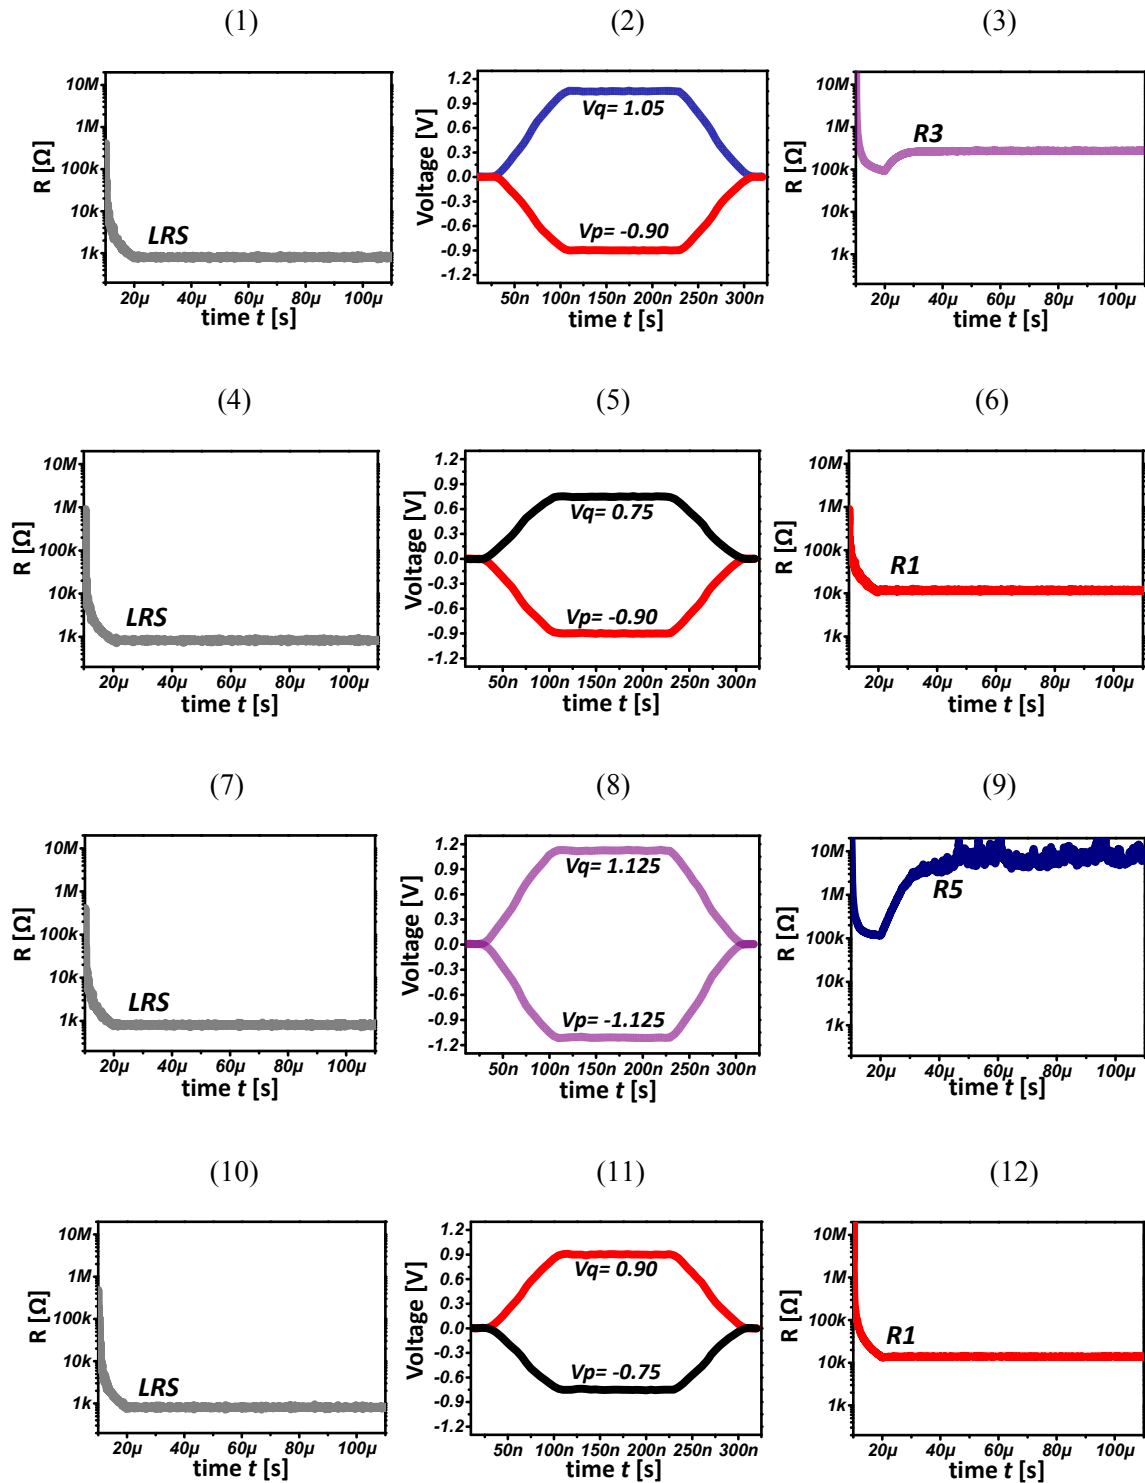

**Figure S6. Sum calculation in  $z_2$  step-by-step.** (1) Initialization: SET to LRS. (2) Carry calculation. (3) State is R3 → Mapping to R1 required. (4) LRS after SET. (5) Write to R1. (6) State is R1. (7) LRS after SET. (8) Carry calculation. (9) State is R5 → Mapping to R1 required. (10) LRS after SET. (11) Write R1. (12) Final state R1.

Color code for voltages: see Fig. 3a. Color code for resistances: see Fig. 3b.

## S4 Peripheral Circuitry

To enable modular arithmetic, one additional control block is required implementing the state machine.

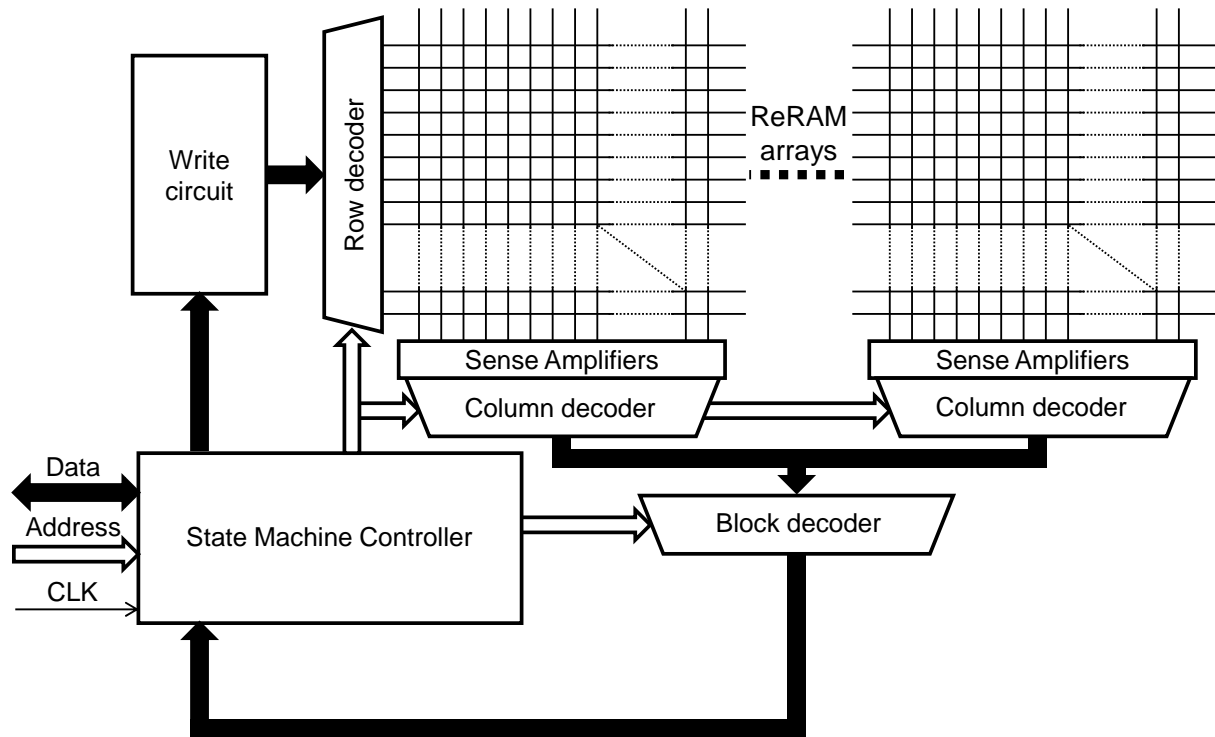

**Figure S7. Peripheral Circuitry.** The crossbar ReRAM memory arrays are controlled by a write circuit, sense amplifier, row, and column and block decoders. Additionally, a state machine controller is required to support the in-memory operation. This circuitry implements the state machines drawn in Fig. 4, especially the OFFSET, logic and SET/RESET control.
